# Supplementary material
Source: PubMed Central journal article supplement (PMC5536344)
Supplement: NIHMS876773-supplement-supplemental_data.pdf [file NIHMS876773-supplement-supplemental_data.pdf]

**A. Pr55<sup>Gag</sup> protein expression in different media**

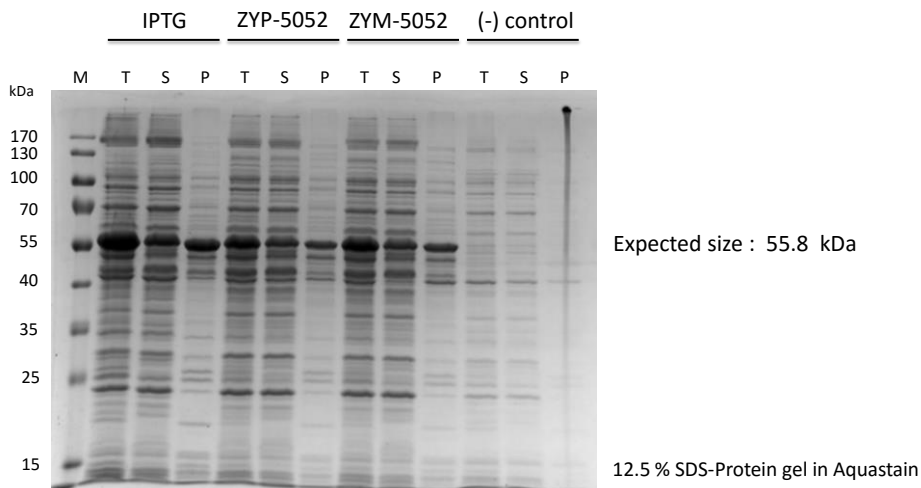

**B. Pr55<sup>Gag</sup>-His protein expression in different media**

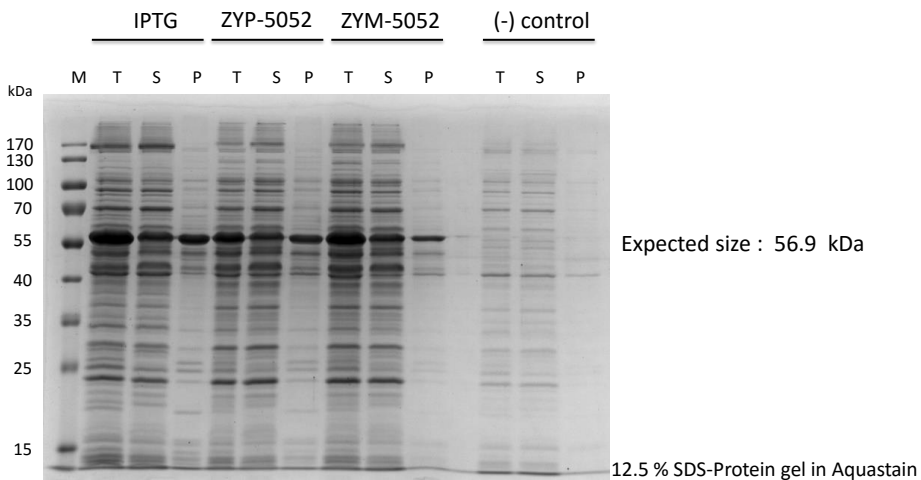

C. Pr55<sup>Gag</sup>-TEV-His protein expression in different media

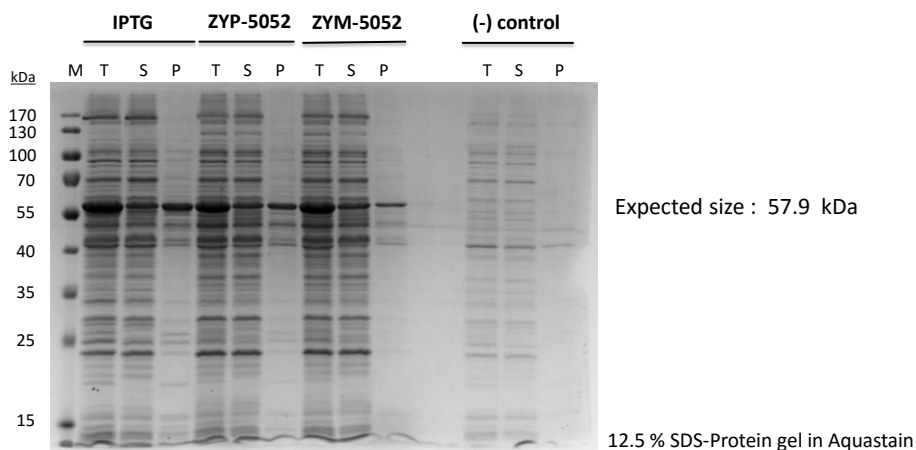

SUPPLEMENTAL

FIGURE 1. **Expression and solubility of Pr55<sup>Gag</sup>, Pr55<sup>Gag</sup>-His and Pr55<sup>Gag</sup>-TEV-His in three different media.** (A) Coomassie-stained 12.5% SDS-PAGE containing purified HIV Pr55<sup>Gag</sup>, (B) Pr55<sup>Gag</sup>-His proteins and (C) Pr55<sup>Gag</sup>-TEV-His. For each gel, the left hand lane contains PageRuler unstained ladder with molecular masses of standard proteins indicated. T = total, S=supernatant, P=pellet

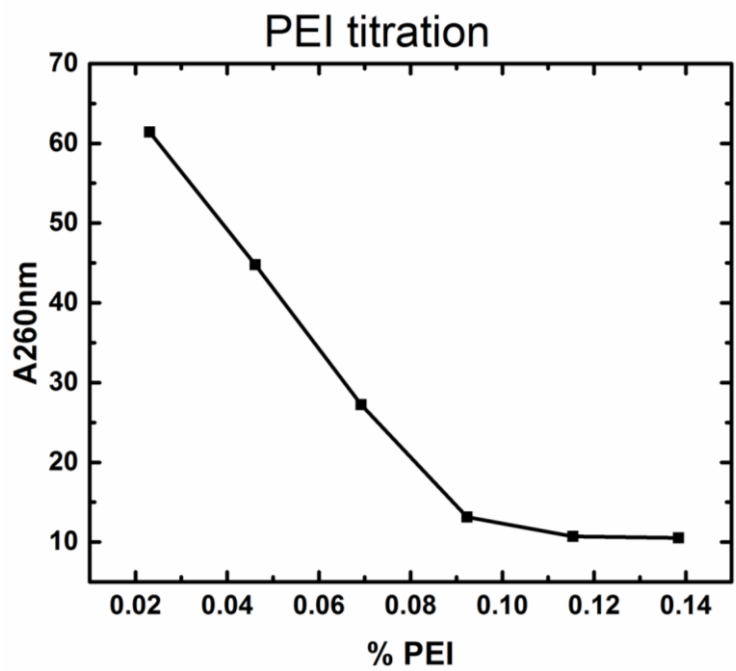

SUPPLEMENTAL FIGURE 2. Effect of varying PEI concentrations on absorbance at 260 nm for Pr55<sup>Gag</sup>-His
